# Supplementary material
Source: PubMed Central journal article supplement (PMC4248019)
Supplement: NIHMS632336-supplement-1.pdf [file NIHMS632336-supplement-1.pdf]

Elsevier Editorial System(tm) for Toxicon  
Manuscript Draft

Manuscript Number: TOXCON-D-14-00312R2

Title: A Tripartite Cocktail of Chimeric Monoclonal Antibodies Passively Protects Mice against Ricin, Staphylococcal Enterotoxin B and Clostridium perfringens Epsilon Toxin

Article Type: Short Communication

Keywords: antibody; toxin; biodefense; therapeutic

Corresponding Author: Dr. Nicholas Mantis,

Corresponding Author's Institution: Wadsworth Center

First Author: Erin K Sully

Order of Authors: Erin K Sully; Kevin Whaley; Natasha Bohorova; Ognian Bohorova; Charles Goodman; Do Kim; Michael Pauly; Jesus Velasco; Frederick W Holtsberg; Eric Stavale; M. Javad Aman; Chandra Tangudu; Francisco Uzal; Nicholas Mantis; Larry Zeitlin

Abstract: Due to the fast-acting nature of ricin, staphylococcal enterotoxin (SEB), and Clostridium perfringens epsilon toxin (ETX), it is necessary that therapeutic interventions following a bioterrorism incident by one of these toxins occur as soon as possible after intoxication. Moreover, because the clinical manifestations of intoxication by these toxins are likely to be indistinguishable from each other, especially following aerosol exposure, we have developed a cocktail of chimeric monoclonal antibodies that is capable of neutralizing all three toxins. The efficacy of this cocktail was demonstrated in mouse models of lethal dose toxin challenge.

Suggested Reviewers:

Opposed Reviewers:

August 28, 2014

Dr. Alan Harvey  
Editor in Chief, *Toxicon*

Dear Dr. Harvey:

I am pleased to submit to you a revised version of manuscript Toxcon-D-13-0312 entitled "A Tripartite Cocktail of Chimeric Monoclonal Antibodies Passively Protects Mice against Ricin, Staphylococcal Enterotoxin B and Clostridium perfringens Epsilon Toxin" for consideration as an **Short Communication** in *Toxicon*.

The manuscript has been *re-revised* in response to the Reviewer's comments and a point-by-point rebuttal letter is provided. Specifically, we have made a concerted effort to highlight the fact that we have not investigated the potential of the tripartite cocktail as a therapeutic except in the case of ricin toxin.

As noted previously, this study represents an advance within the field of antibody-based therapeutics for biothreat toxins. In this study we describe a cocktail of chimeric monoclonal antibodies that is capable of neutralizing three toxins: staphylococcal enterotoxin (SEB), *Clostridium perfringens* epsilon toxin (ETX) and ricin toxin. We demonstrate the efficacy of this cocktail in mouse models of lethal dose toxin challenge. This cocktail may prove useful as a therapeutic following a bioterrorism incident by one of these toxins.

Thank you in advance for re-considering this manuscript for publication in *Toxicon*.

Sincerely,

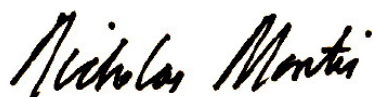

Nicholas Mantis, Ph.D.

Response to Reviewer (Toxcon-D-14-00312)

**Reviewer #1: My poorly -articulated objection resulted from the extrapolation of the therapeutic potential to all three toxins. Data was shown that there is therapeutic potential against ricin. No data was shown for the other toxins. Yet, the authors seem to generalize these results to all three toxins when they talk about using "these mAbs" in "...military personnel as a post exposure therapeutic". This is where I think there needs to be editorial adjustment. The authors should clearly state the limitations of their data. They are free to state their hypothesis/belief that the cocktail will indeed be effective against all three, but should point out that the studies confirming this are either upcoming or in progress. With this modification, I believe this manuscript is worthy of publication in Toxicon.**

*We thank the Reviewer for taking time to clarify his/her critique and to point out what is clearly a notable limitation of the study that warrants further discussion. We have made the following three modifications to the manuscript in response to the Reviewer's comments:*

modification 1: We have removed the sentence (formerly lines 145-146) stating "Nonetheless, these data underscore the potential utility of a cocktail as a therapeutic against three disparate toxins" so as not to overplay the therapeutic side of the cocktail

modification 2: We have inserted the sentence (line 152) "We therefore envision that the chimeric mAbs (or fully humanized derivatives) could be used as a means of providing passive immunity to first responders, laboratory staff or military personnel in the event that they may be at risk of toxin exposure."

modification 3: The following paragraph has been inserted into the manuscript: "We also envision the possibility that the cocktail could be used as a post-exposure therapeutic, although it is important to underscore that in this study we have only examined the potential of the tripartite cocktail to rescue mice following ricin challenge. We did not investigate whether the combination of cPB10, c19F1 and c4D7 had any therapeutic activity against SEB or ETX. Indeed, rescuing an individual following *C. perfringens* ETX exposure may be a particularly formidable challenge considering that the toxin exerts its effects on host cells virtually instantaneously. In the ETX-challenge model employed in this study, control mice succumbed to intoxication with 12 h, indicating that the therapeutic window (in rodents, at least) is likely to be very narrow. However, as is the case for ricin and SEB, the actual therapeutic potential of any antibody against ETX is going to be dependent on the amount and route (i.e., systemic versus mucosal) of toxin exposure. From the results of our limited *in vitro* and *in vivo* analysis of the combination of cPB10, c19F1 and c4D7 antibodies, we can only speculate that the tripartite cocktail has therapeutic utility in humans in an actual clinical setting."

**Sully**  
[Click here to download Conflict of Interest form: coi\\_disclosure \(sully\).pdf](#)

**Mantis**

[Click here to download Conflict of Interest form: coi\\_disclosure\\_Mantis.pdf](#)

**Stavale**

[Click here to download Conflict of Interest form: coi\\_disclosure-E-Stavale.pdf](#)

Holtzberg

[Click here to download Conflict of Interest form: coi\\_disclosure-F-Holtzberg.pdf](#)

**Aman**  
[Click here to download Conflict of Interest form: coi\\_disclosure-MJ-Aman.pdf](#)



**Borhov**

[Click here to download Conflict of Interest form: coi\\_disclosure\(Bohorov\).pdf](#)

**Borhova**

[Click here to download Conflict of Interest form: coi\\_disclosure\(Bohorova\).pdf](#)

**Goodman**

[Click here to download Conflict of Interest form: coi\\_disclosure\(Goodman\).pdf](#)

Kim

[Click here to download Conflict of Interest form: coi\\_disclosure\(Kim\).pdf](#)

**Pauly**  
[Click here to download Conflict of Interest form: coi\\_disclosure\(Pauly\).pdf](#)

**Velasco**

[Click here to download Conflict of Interest form: coi\\_disclosure\(Velasco\).pdf](#)

**Whaley**

[Click here to download Conflict of Interest form: coi\\_disclosure\(Whaley\).pdf](#)

**Zeitlin**

[Click here to download Conflict of Interest form: coi\\_disclosure\(Zeitlin\).pdf](#)



**Tangudu**

[Click here to download Conflict of Interest form: coi\\_Tangudu.pdf](#)

**Uzal**  
[Click here to download Conflict of Interest form: coi\\_Uzal.pdf](#)

## **Ethical Statement**

With this letter I attest that the manuscript entitled “A Tripartite Cocktail of Chimeric Monoclonal Antibodies Passively Protects Mice against Ricin, Staphylococcal Enterotoxin B and Clostridium perfringens Epsilon Toxin” to be submitted to *Toxicon* is an original study that has not previously been submitted to this (or any other) journal. In submitting this article we (the authors) have adhered to the ethical guidelines as described by the publisher:

<http://www.elsevier.com/publishingethics> and

<http://www.elsevier.com/ethicalguidelines>.

## HIGHLIGHTS

- Ricin, staphylococcal enterotoxin (SEB), and *Clostridium perfringens* epsilon toxin (ETX) are biothreat toxins
- We developed a cocktail of chimeric monoclonal antibodies (mAbs) that neutralizes all three toxins
- Chimeric mAbs were expressed using a robust plant-based platform
- The tripartite cocktail also passively protected mice against ricin, SEB, and ETX in relevant challenge models
- These studies represent a major advancement towards a broad antitoxin antibody-based therapeutic

1                   **A Tripartite Cocktail of Chimeric Monoclonal Antibodies**  
2                   **Passively Protects Mice against Ricin, Staphylococcal Enterotoxin B and**  
3                   ***Clostridium perfringens* Epsilon Toxin**

4  
5  
6  
7 Erin K. Sully<sup>1</sup>, Kevin Whaley<sup>2</sup>, Natasha Bohorova<sup>2</sup>, Ognian Bohorov<sup>2</sup>, Charles Goodman<sup>2</sup>, Do  
8 Kim<sup>2</sup>, Michael Pauly<sup>2</sup>, Jesus Velasco<sup>2</sup>, Frederick W. Holtsberg<sup>3</sup>, Eric Stavale<sup>3</sup>, M. Javad Aman<sup>3</sup>,  
9 Chandra Tangudu<sup>4</sup>, Francisco A. Uzal<sup>5</sup>, Nicholas J. Mantis<sup>1,6,\*</sup> and Larry Zeitlin<sup>2,\*</sup>

10  
11                   <sup>1</sup>Division of Infectious Disease, Wadsworth Center, New York State Department of Health,  
12 Albany, NY; <sup>2</sup>Mapp Biopharmaceutical, Inc. San Diego, CA; <sup>3</sup>Integrated BioTherapeutics,  
13 Gaithersburg, MD; <sup>4</sup>Department of Veterinary Sciences, Iowa State University; <sup>5</sup>University of  
14 California, Davis; <sup>6</sup>Department of Biomedical Sciences, School of Public Health, University at  
15 Albany, Albany, NY

16  
17                   Running title: Antibody Cocktail against Category B Toxins

18  
19                   Keywords: antibody, toxin, biodefense, therapeutic

20  
21  
22  
23 \*Corresponding authors: Nicholas Mantis, Division of Infectious Diseases, Wadsworth Center,  
24 120 New Scotland Ave, Albany, NY 12208; Phone: 518-473-7487; email:  
25 [nicholas.mantis@health.ny.gov](mailto:nicholas.mantis@health.ny.gov) and Larry Zeitlin, Mapp Biopharmaceutical, Inc. San Diego, CA  
26 92121; Phone: 858-625-0335; email: [larry.zeitlin@mappbio.com](mailto:larry.zeitlin@mappbio.com)

27

28 **HIGHLIGHTS**

- 29       ● Ricin, staphylococcal enterotoxin (SEB), and *Clostridium perfringens* epsilon toxin  
30       (ETX) are biothreat toxins
- 31       ● We developed a cocktail of chimeric monoclonal antibodies (mAbs) that neutralizes all  
32       three toxins
- 33       ● Chimeric mAbs were expressed using a robust plant-based platform
- 34       ● The tripartite cocktail also passively protected mice against ricin, SEB, and ETX in  
35       relevant challenge models
- 36       ● These studies represent a major advancement towards a broad antitoxin antibody-based  
37       therapeutic

38

39 **ABSTRACT**

40 Due to the fast-acting nature of ricin, staphylococcal enterotoxin (SEB), and *Clostridium*  
41 *perfringens* epsilon toxin (ETX), it is necessary that therapeutic interventions following a  
42 bioterrorism incident by one of these toxins occur as soon as possible after intoxication.  
43 Moreover, because the clinical manifestations of intoxication by these toxins are likely to be  
44 indistinguishable from each other, especially following aerosol exposure, we have developed a  
45 cocktail of chimeric monoclonal antibodies that is capable of neutralizing all three toxins. The  
46 efficacy of this cocktail was demonstrated in mouse models of lethal dose toxin challenge.  
47

48 The development of therapeutics directed against the Select Agents and Toxins poses  
49 significant and unique challenges. Foremost, the pathogens and toxins that are currently  
50 classified by the Centers for Disease Control and Prevention (CDC) as potential biothreat agents  
51 are genetically, evolutionarily, and structurally diverse, thereby necessitating therapeutics  
52 tailored against each agent (Mantis et al., 2011). Second, many of these agents, but in particular  
53 the toxins, can induce morbidity and even mortality within a matter of hours, which means that  
54 therapeutic interventions treatments will likely be initiated in the absence of definitive etiologic  
55 diagnosis (Wolfe et al., 2013). In addition, the earliest clinical manifestations of many select  
56 agents and toxins are expected to be indistinguishable from each other, which in a clinical setting  
57 may necessitate the administration of combinations of therapies (2007).

58 Ricin toxin, staphylococcal enterotoxin B (SEB), and *Clostridium perfringens* epsilon toxin  
59 (ETX) are fast acting, highly toxic and potentially lethal agents for which there are currently no  
60 available countermeasures (Mantis, 2005). The toxins are from unrelated sources and share no  
61 obvious functional domains or enzymatic activities (**Table 1; Figure S1**). Ricin toxin is a 65  
62 kDa heterodimeric glycoprotein from the castor bean plant (*Ricinus communis*). The A subunit  
63 of ricin (RTA) is a ribosome-inactivating protein (RIP), while the B subunit (RTB) is a lectin  
64 that modulates toxin attachment and entry into mammalian cells. SEB is a 28 kDa superantigen  
65 produced by *Staphylococcus aureus* that, when ingested, causes symptoms that are classically  
66 associated with food poisoning, including cramps, vomiting and diarrhea (Krakauer and Stiles,  
67 2013). While oral exposure to SEB is debilitating, it is rarely fatal. This is in contrast to SEB  
68 aerosol exposure, which in non-human primate models results in pulmonary endema and  
69 systemic complications (Lindsay and Griffiths, 2013; Mattix et al., 1995). Finally, ETX is a 33  
70 kDa  $\beta$ -pore-forming toxin (PFT) secreted by *Clostridium perfringens* types B and D, which are



71 economically important pathogens associated with enterotoxemia in several species of livestock  
72 (Stiles et al., 2013; Uzal et al., 2014). All three toxins cross epithelial barriers and can elicit  
73 mucosal and systemic damage following ingestion or inhalation (Mantis, 2005). Due to the  
74 capacity of these toxins to induce similar clinical signs, morbidity and mortality, and their  
75 recognized potential as biological warfare and bioterrorism agents, we reasoned that a tripartite  
76 antitoxin cocktail capable of neutralizing ricin, SEB, and ETX would be of significant medical  
77 benefit.

78 Neutralizing mAbs against ricin, SEB, and ETX have been previously described (**Table 1**);  
79 mAb PB10 is directed against ricin toxin (Sully et al., 2014), 19F1 against SEB (L.Zeitlin,  
80 manuscript in preparation), and 4D7 against ETX (Garcia et al., 2014; Hauer and Clough, 1999).  
81 The murine variable domains of each of the mAbs were synthesized (Life Technologies; San  
82 Diego, CA) and grafted onto human IgG<sub>1</sub> frameworks, and transformed into *Agrobacterium*  
83 *tumefaciens*, which were then used for vacuum infiltration of *Nicotiana benthamiana* using the  
84 rapid antibody-manufacturing platform (RAMP) based on magnICON (Giritch et al., 2006; Hiatt  
85 and Pauly, 2006). RAMP makes use of transgenic *N. benthamiana* (Strasser et al., 2008) in  
86 which plant-specific glycosyl-transferases have been inhibited by RNAi, so the resulting mAbs  
87 contain mammalian N-glycans. The resulting chimeric (c-) derivatives of PB10, 19F1, and 4D7  
88 have each been shown to retain potent toxin-neutralizing activity and to passively protect mice  
89 against a cognate toxin challenge (Garcia et al., 2014; Sully et al., 2014).

90 To examine the functional properties of a cocktail of plant-derived cPB10, c19F1, and c4D7,  
91 the three chimeric mAbs were combined at equimolar amounts and evaluated for toxin binding  
92 activity by ELISA and for toxin-neutralizing activities in cell-based cytotoxicity assays. We  
93 found that the binding profile of cPB10 as part of the tripartite cocktail was identical to cPB10

94 alone and its parenteral murine counterpart in terms of reactivity with RTA, ricin holotoxin, and  
95 its linear peptide epitope (**Figure 1A,C**). Moreover, the 50% inhibitory concentration ( $IC_{50}$ ) of  
96 cPB10 was the same whether cPB10 was tested by itself or combined with c19F1 and c4D7  
97 (**Figure 1B**). The toxin-binding activities (**data not shown**) as well as toxin-neutralizing  
98 activities (**Figure 1D,E**) of c19F1 and c4D7 as a cocktail were also indistinguishable from the  
99 individual mAbs themselves. These data indicate that there is no evidence to suggest that the  
100 different chimeric mAbs interfere with each other's function activities.

101 We next evaluated the tripartite cocktail for the ability to passively protect mice against  
102 ricin, SEB, and ETX in well-established mouse models of toxin challenge. For ricin toxin, mice  
103 received 5  $\mu$ g, 2.5  $\mu$ g or 1.5  $\mu$ g of cPB10, by itself or as part of the tripartite cocktail, and were  
104 then challenged with 10 x  $LD_{50}$  ricin (**Figure 2A**). As expected, control mice succumbed to ricin  
105 intoxication within 48 h. Protection afforded by cPB10 was dose-dependent and was identical  
106 whether cPB10 was administered alone or in combination with c19F1 and c4D7, demonstrating  
107 that neither the anti-SEB or anti-ETX mAb interferes with cPB10. The reciprocal passive  
108 protection studies were done with the cocktail using mouse models of SEB and ETX  
109 intoxication. The SEB challenge model consisted of i.p. injection of 5 x  $LD_{50}$  SEB followed 4 h  
110 later by a potentiating dose of lipopolysaccharide (40  $\mu$ g; List Biological Laboratories, Campbell,  
111 CA). Protection afforded by c19F1 was dose-dependent with complete survival observed in  
112 mice receiving 100  $\mu$ g of c19F1, alone or in combination with c4D7 and cPB10 (**Figure 2B**).  
113 Finally, mAb c4D7 was able to fully protect mice when administered as part of the tripartite  
114 cocktail. The ETX challenge model involved i.p. administration of the cocktail to mice 24 h  
115 prior to intravenous injection of 3 x  $LD_{50}$  ETX, as described previously (Garcia et al., 2014).  
116 Control mice succumbed to toxin-induced death within 12 h, whereas cocktail-treated mice

117 survived without showing any clinical abnormalities (**Figure 2C**). Additional control mice  
118 treated only with c4D7 also survived without showing any clinical abnormalities. These data  
119 demonstrate the potential of a mixture of cPB10, c19F1 and c4D7 to protect mice against lethal  
120 challenge doses of ricin, SEB, and ETX.

121 We next wished to further evaluate the tripartite antitoxin cocktail in a mucosal challenge  
122 model and as a possible therapeutic. We chose ricin toxin for these studies since cPB10 has been  
123 recently evaluated in respiratory tract challenge model and its therapeutic window has been  
124 established (Sully et al., 2014). Groups of mice received 120  $\mu\text{g}$ , 60  $\mu\text{g}$  or 20  $\mu\text{g}$  of cPB10 in the  
125 context of the cocktail and then challenged with the same dose of ricin as above, but delivered  
126 via the intranasal (i.n.) route. Protection afforded by the tripartite cocktail was dose-dependent  
127 (**Figure 3A**); mice that received 120  $\mu\text{g}$  cPB10 were protected from ricin challenge and  
128 experienced a transient reduction in blood glucose levels (**Figure 3B**); half the mice that received  
129 60  $\mu\text{g}$  cPB10 were protected against ricin, whereas the control mice (no cPB10) or mice that  
130 received 20  $\mu\text{g}$  of cPB10 experienced a rapid onset of hypoglycemia and succumbed to toxin-  
131 induced death within 48 h. These data demonstrate cPB10 within the context of the cocktail is  
132 protective against respiratory tract challenge but that the amount of antibody required for  
133 protection was 10-20 times that required for systemic challenge. Because the exact  $\text{LD}_{50}$  for i.n.  
134 challenge is unknown, this requirement for increased dosing of mAb could be due to i.n.  
135 challenge being more lethal than systemic challenge or due to a need for higher mAb  
136 concentrations for protection on mucosal surfaces. In future studies, this observation will be  
137 validated in an aerosol challenge model as it may have important implications for ricin-based  
138 antibody prophylactics.

139           Finally, to assess the therapeutic potential of the tripartite cocktail, mice were challenged  
140 with 10 x LD<sub>50</sub> ricin and then administered the cocktail at hourly intervals thereafter at amounts  
141 equivalent to 25 µg cPB10 per mouse (**Figure 3C**). In agreement with what we reported recently  
142 for cPB10 alone (Sully et al., 2014), the tripartite cocktail was able to fully rescue mice from  
143 toxin-induced death if administered within 4 h following challenge. It should be underscored  
144 that the mouse model is particularly stringent and that the actual therapeutic window in humans  
145 may in fact be greater than 4 h depending on the dose.

146           In summary, we have generated a cocktail of chimeric mAbs against three putative  
147 biothreat toxins derived from common, readily accessible plant (ricin) and bacteria (ETX and  
148 SEB). Due to their excellent safety profile and efficacy, mAbs are a rapidly growing class of  
149 therapeutic drugs (Reichert et al., 2005). Moreover, passive immunization with antibodies has  
150 been shown to be effective against a wide variety of toxins (Froude et al., 2011; Wang et al.,  
151 2013). We therefore envision that the chimeric mAbs (or fully humanized derivatives) could be  
152 used as a means of providing passive immunity to first responders, laboratory staff or military  
153 personnel in the event that they may be at risk of toxin exposure. As alluded to above, future  
154 improvements to the cocktail may include humanization of the mAbs and the engineering of  
155 point mutations in the Fc gamma chain constant regions that result in extended serum half-life  
156 with the possibility of using the cocktail as a prophylactic and provide passive protection for  
157 greater than six months (Robbie et al., 2013; Zalevsky et al., 2010). Such a cocktail would  
158 constitute a significant resource within the public health and biodefense community.

159           We also envision the possibility that the cocktail could be used as a post-exposure  
160 therapeutic, although it is important to underscore that in this study we have only examined the  
161 potential of the tripartite cocktail to rescue mice following ricin challenge. We did not

162 investigate whether the combination of cPB10, c19F1 and c4D7 had any therapeutic activity  
163 against SEB or ETX. Indeed, rescuing an individual following *C. perfringens* ETX exposure  
164 may be a particularly formidable challenge considering that the toxin exerts its effects on host  
165 cells virtually instantaneously. In the ETX-challenge model employed in this study, control mice  
166 succumbed to intoxication with 12 h, indicating that the therapeutic window (in rodents, at least)  
167 is likely to be very narrow. However, as is the case for ricin and SEB, the actual therapeutic  
168 potential of any antibody against ETX is going to be dependent on the amount and route (i.e.,  
169 systemic versus mucosal) of toxin exposure. From the results of our limited *in vitro* and *in vivo*  
170 analysis of the combination of cPB10, c19F1 and c4D7 antibodies, we can only speculate that  
171 the tripartite cocktail has therapeutic utility in humans in an actual clinical setting.

172

173

174

175 **ACKNOWLEDGEMENTS**

176 The authors thank Drs. Yuri Gleba and Victor Klimyuk for access to the Icon Genetics'  
177 magnICON system and Dr. Herta Steinkellner for access to the transgenic *N. benthamiana*. This  
178 work was supported by NIH grants U01AI082276 (LZ), R01AI098774 (LZ).

179

180 **REFERENCES**

181 2007. NIAID Strategic Plan for Biodefense Research - 2007 Update.

182 Berman, H.M., Westbrook, J., Feng, Z., Gilliland, G., Bhat, T.N., Weissig, H., Shindyalov, I.N.,  
183 Bourne, P.E., 2000. The Protein Data Bank. *Nucleic Acids Res* 28, 235-242.

184 Froude, J.W., 2nd, Stiles, B., Pelat, T., Thullier, P., 2011. Antibodies for biodefense. *MAbs* 3.

185 Garcia, J.P., Beingesser, J., Bohorov, O., Bohorova, N., Goodman, C., Kim, D., Pauly, M.,  
186 Velasco, J., Whaley, K., Zeitlin, L., Roy, C.J., Uzal, F.A., 2014. Prevention and treatment of  
187 *Clostridium perfringens* epsilon toxin intoxication in mice with a neutralizing monoclonal  
188 antibody (c4D7) produced in *Nicotiana benthamiana*. *Toxicon* 88C, 93-98.

189 Giritch, A., Marillonnet, S., Engler, C., van Eldik, G., Botterman, J., Klimyuk, V., Gleba, Y.,  
190 2006. Rapid high-yield expression of full-size IgG antibodies in plants coinfecting with  
191 noncompeting viral vectors. *Proc Natl Acad Sci U S A* 103, 14701-14706.

192 Hauer, P.J., Clough, N.E., 1999. Development of monoclonal antibodies suitable for use in  
193 antigen quantification potency tests for clostridial veterinary vaccines. *Developments in*  
194 *biological standardization* 101, 85-94.

195 Hiatt, A., Pauly, M., 2006. Monoclonal antibodies from plants: A new speed record. *Proceedings*  
196 *of the National Academy of Sciences* 103, 14645-14646.

197 Karauzum, H., Chen, G., Abaandou, L., Mahmoudieh, M., Boroun, A.R., Shulenin, S., Devi,  
198 V.S., Stavale, E., Warfield, K.L., Zeitlin, L., Roy, C.J., Sidhu, S.S., Aman, M.J., 2012.  
199 Synthetic human monoclonal antibodies toward staphylococcal enterotoxin B (SEB)  
200 protective against toxic shock syndrome. *J Biol Chem* 287, 25203-25215.

201 Krakauer, T., Stiles, B.G., 2013. The staphylococcal enterotoxin (SE) family: SEB and siblings.  
202 *Virulence* 4, 759-773.

203 Lindsay, C.D., Griffiths, G.D., 2013. Addressing bioterrorism concerns: options for investigating  
204 the mechanism of action of *Staphylococcus aureus* enterotoxin B. *Human & experimental*  
205 *toxicology* 32, 606-619.

206 Mantis, N.J., 2005. Vaccines against the category B toxins: *Staphylococcal enterotoxin B*,  
207 *epsilon toxin* and *ricin*. *Adv Drug Deliv Rev* 57, 1424-1439.

208 Mantis, N.J., Morici, L.A., Roy, C.J., 2011. Mucosal Vaccines for Biodefense. *Curr Top*  
209 *Microbiol Immunol*.

210 Mattix, M.E., Hunt, R.E., Wilhelmsen, C.L., Johnson, A.J., Baze, W.B., 1995. Aerosolized  
211 *staphylococcal enterotoxin B*-induced pulmonary lesions in rhesus monkeys (*Macaca*  
212 *mulatta*). *Toxicol Pathol* 23, 262-268.

213 O'Hara, J.M., Brey, R.N., Mantis, N.J., 2013. Comparative Efficacy in Mice of Two Lead  
214 Candidate Ricin Toxin A Subunit (RTA) Vaccine. *Clinical and Vaccine Immunology* in press.

215 Reichert, J.M., Rosensweig, C.J., Faden, L.B., Dewitz, M.C., 2005. Monoclonal antibody  
216 successes in the clinic. *Nat Biotechnol* 23, 1073-1078.

217 Robbie, G.J., Criste, R., Dall'acqua, W.F., Jensen, K., Patel, N.K., Losonsky, G.A., Griffin, M.P.,  
218 2013. A novel investigational Fc-modified humanized monoclonal antibody, motavizumab-  
219 YTE, has an extended half-life in healthy adults. *Antimicrob Agents Chemother* 57, 6147-  
220 6153.

221 Robertson, S.L., Li, J., Uzal, F.A., McClane, B.A., 2011. Evidence for a prepore stage in the  
222 action of *Clostridium perfringens epsilon toxin*. *PLoS One* 6, e22053.

223 Stiles, B.G., Barth, G., Barth, H., Popoff, M.R., 2013. *Clostridium perfringens epsilon toxin*: a  
224 malevolent molecule for animals and man? *Toxins (Basel)* 5, 2138-2160.

225 Strasser, R., Stadlmann, J., Schähs, M., Stiegler, G., Quendler, H., Mach, L., Glössl, J.,  
226 Weterings, K., Pabst, M., Steinkellner, H., 2008. Generation of glyco-engineered *Nicotiana*  
227 *benthamiana* for the production of monoclonal antibodies with a homogeneous human-like N-  
228 glycan structure. *Plant Biotechnology Journal* 6, 392-402.

229 Sully, E.K., Whaley, K.J., Bohorova, N., Bohorov, O., Goodman, C., Kim do, H., Pauly, M.H.,  
230 Velasco, J., Hiatt, E., Morton, J., Swope, K., Roy, C.J., Zeitlin, L., Mantis, N.J., 2014.  
231 Chimeric Plantibody Passively Protects Mice against Aerosolized Ricin Challenge. *Clin*  
232 *Vaccine Immunol* 21, 777-782.

233 Uzal, F.A., Freedman, J.C., Shrestha, A., Theoret, J.R., Garcia, J., Awad, M.M., Adams, V.,  
234 Moore, R.J., Rood, J.I., McClane, B.A., 2014. Towards an understanding of the role of  
235 *Clostridium perfringens* toxins in human and animal disease. *Future microbiology* 9, 361-377.  
236 Vance, D.J., Mantis, N.J., 2012. Resolution of two overlapping neutralizing B cell epitopes  
237 within a solvent exposed, immunodominant alpha-helix in ricin toxin's enzymatic subunit.  
238 *Toxicon* 60, 874-877.  
239 Wang, X.Z., Coljee, V.W., Maynard, J.A., 2013. Back to the future: recombinant polyclonal  
240 antibody therapeutics. *Current opinion in chemical engineering* 2, 405-415.  
241 Wolfe, D.N., Florence, W., Bryant, P., 2013. Current biodefense vaccine programs and  
242 challenges. *Human vaccines & immunotherapeutics* 9.  
243 Zalevsky, J., Chamberlain, A.K., Horton, H.M., Karki, S., Leung, I.W., Sproule, T.J., Lazar,  
244 G.A., Roopenian, D.C., Desjarlais, J.R., 2010. Enhanced antibody half-life improves in vivo  
245 activity. *Nat Biotechnol* 28, 157-159.

246

247

248



249

250 **TABLE(S)**

251

**Table 1. Characteristics of SEB, ETX and ricin toxin and their respective mAbs.**

| <b>Toxin</b> | <b>kDa</b> | <b>Toxin Class</b>    | <b>mAb</b> | <b>Reference</b>      |
|--------------|------------|-----------------------|------------|-----------------------|
| SEB          | 28         | super antigen         | 19F        | <i>in preparation</i> |
| ETX          | 33         | $\beta$ -pore forming | 4D7        | (Garcia et al., 2014) |
| Ricin        | 65         | ribosome-inactivating | PB10       | (Sully et al., 2014)  |

252

253

254

## 255 **FIGURE LEGENDS**

256 **Figure 1. Toxin binding and neutralizing activities associated with the chimeric mAbs in**  
257 **the context of the tripartite cocktail.** The tripartite cocktail was assessed for specificity for  
258 ricin (**panels A-C**), SEB (**panel D**) and ETX (**panel E**). (**A**) cPB10 (alone or in cocktail)  
259 reactivity with ricin holotoxin and subunits by ELISA. Nunc Maxisorb F96 microtiter plates  
260 (ThermoFisher Scientific) were coated by overnight incubation with 1 µg/ml ricin, RTA, RTB or  
261 BSA. Plates were developed using horseradish peroxidase (HRP)-labeled goat anti-human IgG  
262 (Invitrogen) and 3,3',5,5' tetramethylbenzidine (Kirkegaard & Perry Labs, Gaithersburg, MD),  
263 as described (Sully et al., 2014). (**B**) Toxin-neutralizing activity of cPB10. Serial dilutions (in  
264 triplicate) of cPB10, alone or the cocktail were mixed with ricin (10 ng/ml) and then applied to  
265 Vero cells, as described (Sully et al., 2014). Cell viability was assessed 48 h later; (**C**) cPB10  
266 (alone or in cocktail) reactivity with RTA-peptide array. Overlapping 18-mer peptides spanning  
267 the length of RTA (O'Hara et al., 2013) were used to coat Nunc Maxisorb F96 microtiter plates  
268 (ThermoFisher Scientific) before being probed with cPB10. ELISA plates were developed as  
269 described in panel A. Peptide A11 (RTA residues Y91-F108) co corresponds to PB10's known  
270 epitope (Vance and Mantis, 2012). (**D**) The neutralizing activity of c19F1 was determined using  
271 peripheral blood mononuclear cells (PBMCs) and SEB toxin, as described (Karauzum et al.,  
272 2012). The resulting inhibition of INF-γ production by c19F1 or the antibody cocktail were  
273 indistinguishable (**E**) ETX neutralizing assays were performed by incubating ETX with indicated  
274 concentrations of c4D7, alone or in the context of the cocktail. Neutralizing assays were done  
275 using Madin-Darby Canine Kidney (MDCK II) cells, as described (Garcia et al., 2014;  
276 Robertson et al., 2011). ETX was obtained from BEI Resources (Manassas, VA).

277

278 **Figure 2. Protection afforded by the tripartite mAb cocktail in mice upon challenge with**  
279 **ricin, SEB and ETX.** The tripartite mAb cocktail was assessed for the ability to protect mice  
280 against ricin (**panels A, D-F**), SEB (**panel B**) and ETX (**panel C**). All studies involving mice  
281 were done in strict compliance the Institutional Animal Care and Use Committees (IACUC) at  
282 the Wadsworth Center, Iowa State University, and University of California, Davis. (**A**) BALB/c  
283 mice (female, 6-8 weeks of age; Taconic Labs, Hudson, NY) were housed under conventional,  
284 specific pathogen-free conditions. cPB10, alone or in the cocktail was administered to mice

285 (n=10/group) by intraperitoneal (i.p.) injection 24 h prior to challenge with 10x LD<sub>50</sub> ricin (~2 µg  
286 mouse; Vector Laboratories, Burlingame, CA), also by i.p. injection. Survival was monitored  
287 over a period of five days. **(B)** To evaluate c19F1, the chimeric mAb alone or in the context of  
288 the cocktail was mixed with SEB (1 µg) for 1 hr and then injected into BALB/c mice (Karauzum  
289 et al., 2012). Four hours later the animals received a potentiating dose of lipopolysaccharide (40  
290 µg; List Biological Laboratories, Campbell, CA) and were monitored for survival for 5 days.  
291 **(C)** To evaluate c4D7, the chimeric mAb in the context of the cocktail was administered to  
292 female BALB/c mice by i.p. injection, as described previously (Garcia et al., 2014). Twenty-  
293 four hours later, the animals were challenged by intravenous injection 3xLD<sub>50</sub> ETX.

294

295 **Figure 3. Mucosal protection and therapeutic potential of the tripartite cocktail against**  
296 **ricin toxin. (A-B).** Capacity of cPB10 to protect against intranasal ricin challenge. The  
297 tripartite cocktail was administered to mice (n=8 mice per group) by intraperitoneal (i.p.)  
298 injection 24 h prior to intranasal 10 x LD<sub>50</sub> ricin challenge. Mice were monitored for survival  
299 (panel A) and morbidity (panel B), as determined by blood glucose levels (Sully et al., 2014);  
300 **(C)** Groups of BALB/c mice (n=8 per group) were challenged with 10 x LD<sub>50</sub> ricin and then  
301 administered (by i.p. injection) the tripartite cocktail (25 µg of cPB10/mouse) at indicated times  
302 (hours). Survival was monitored for five days.

303

#### 304 SUPPLEMENTARY FIGURE LEGEND

305

306 **Figure S1. Structures of ricin, SEB and *C. perfringens* ETX.** Biological assembly images  
307 from the Protein Data Bank (PDB) (Berman et al., 2000). The images correspond to the  
308 following PDB identifiers: (A) ricin, 2AAI; (B) SEB, 3SEB; (C) ETX, 1UYJ.

Figure 1  
[Click here to download high resolution image](#)

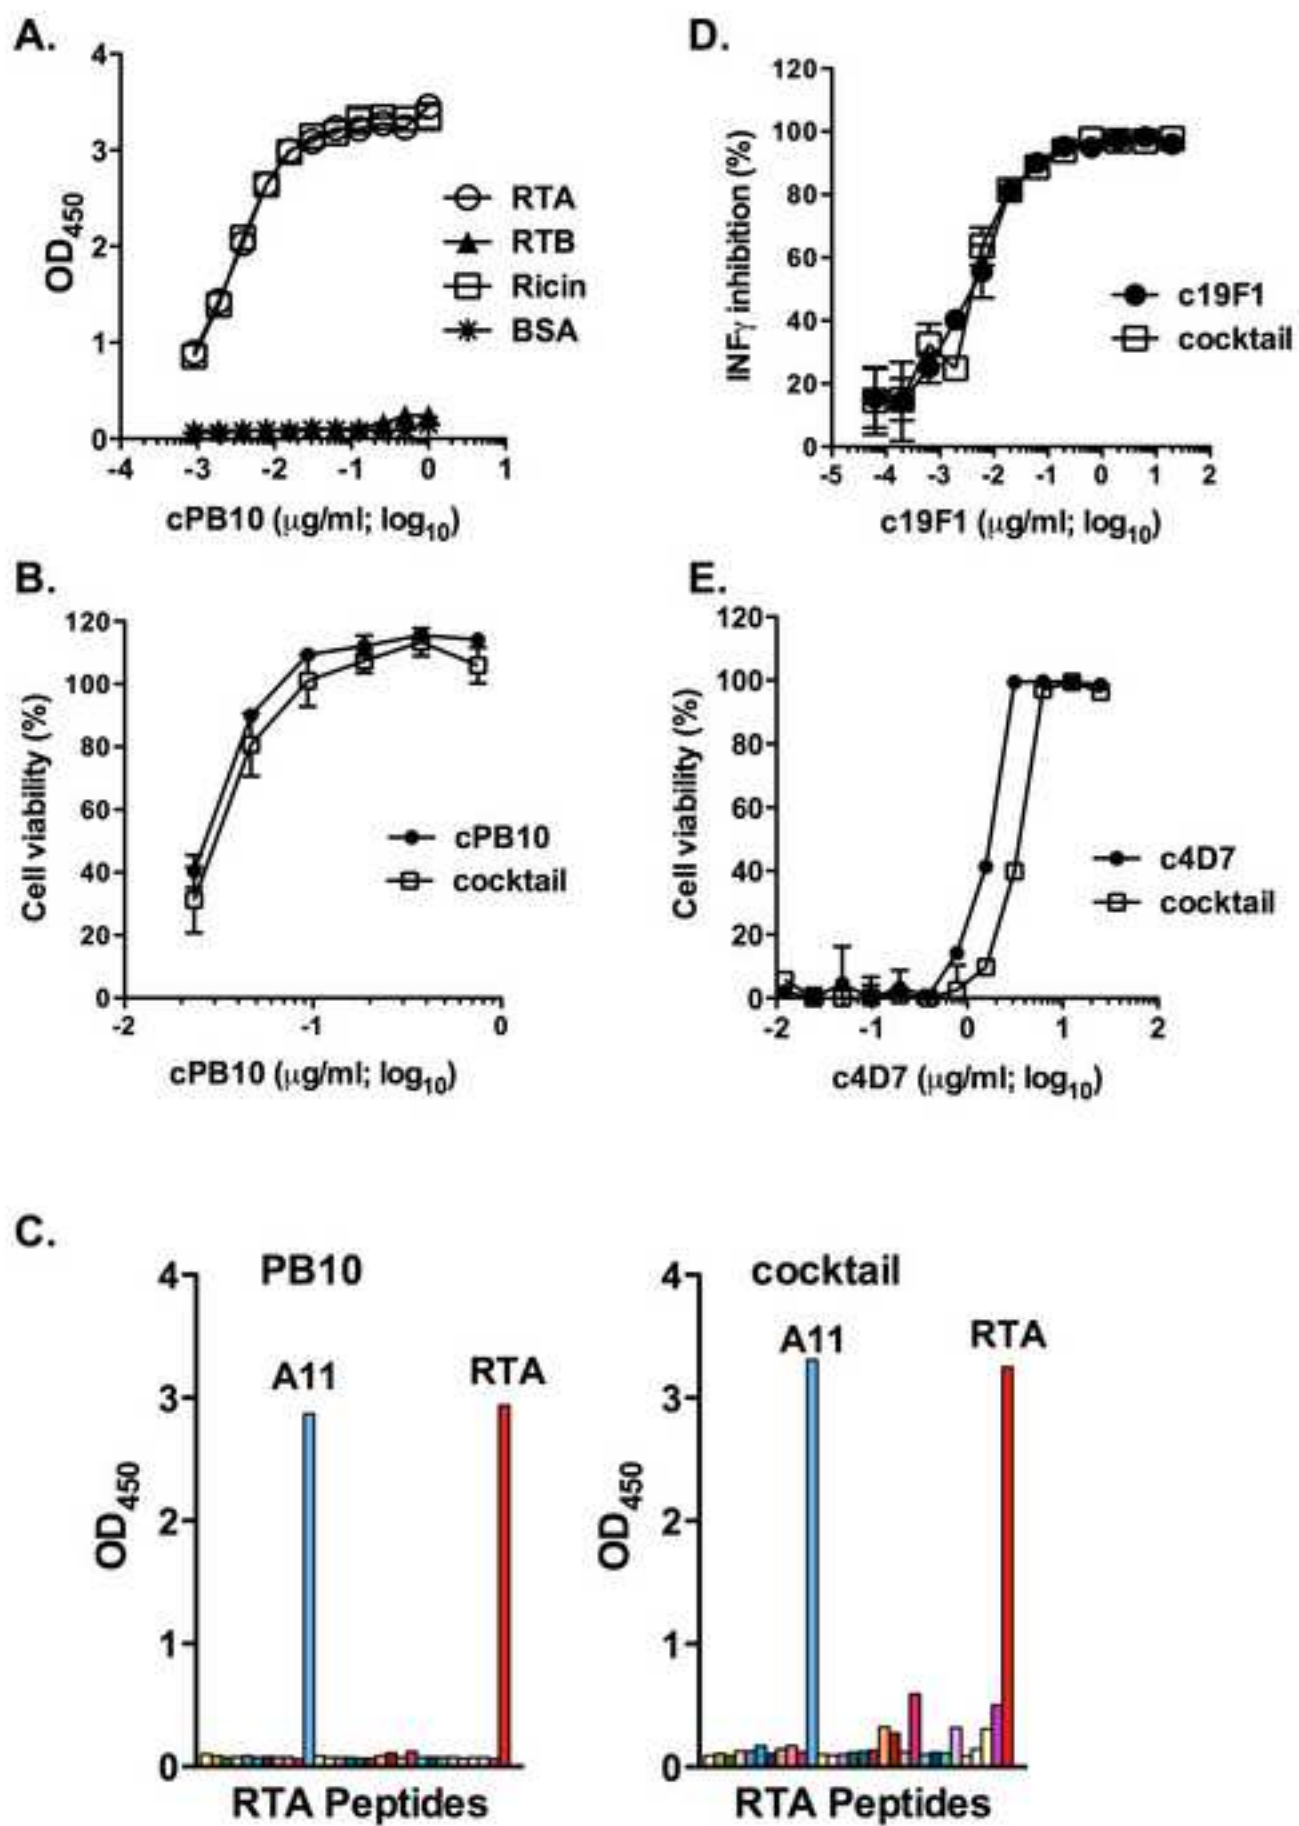

Figure 2

[Click here to download high resolution image](#)

A.

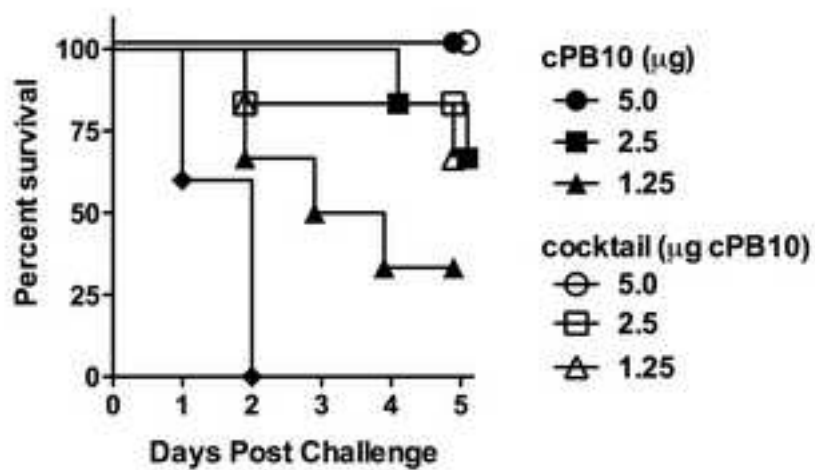

B.

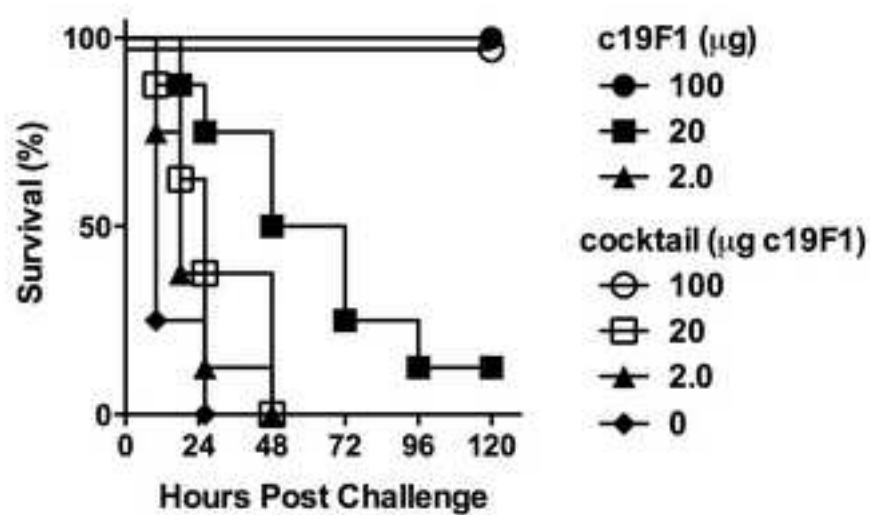

C.

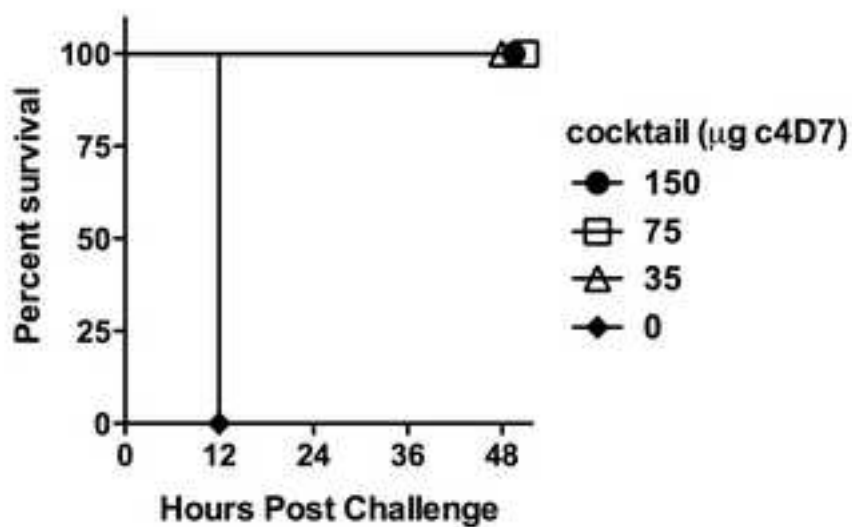

Figure 3

[Click here to download high resolution image](#)

A.

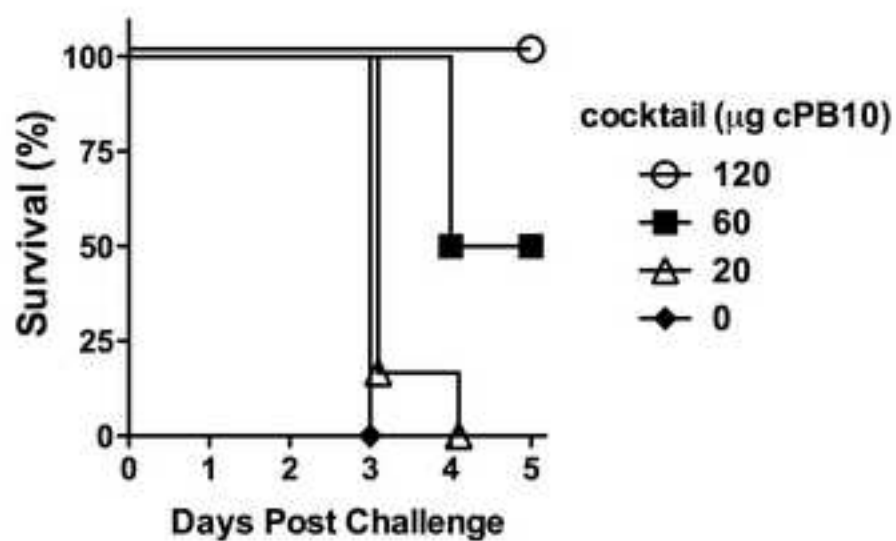

B.

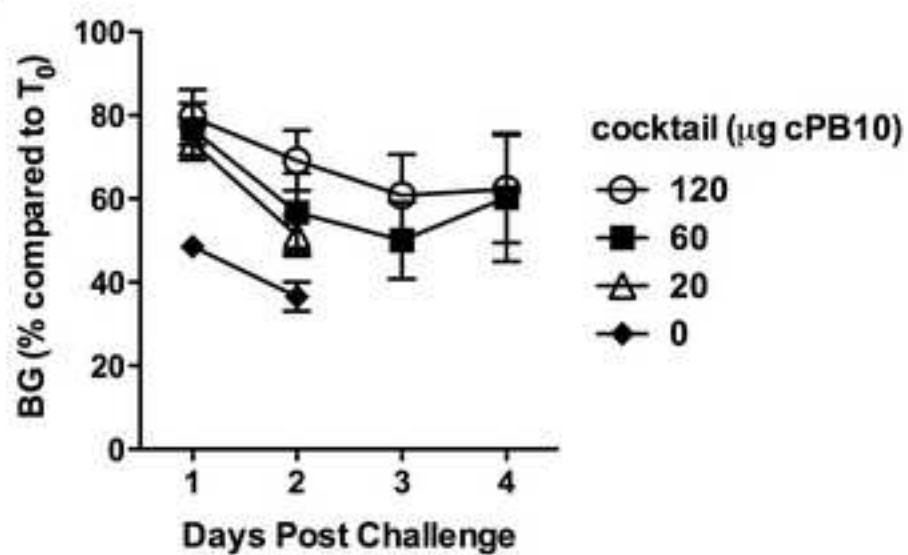

C.

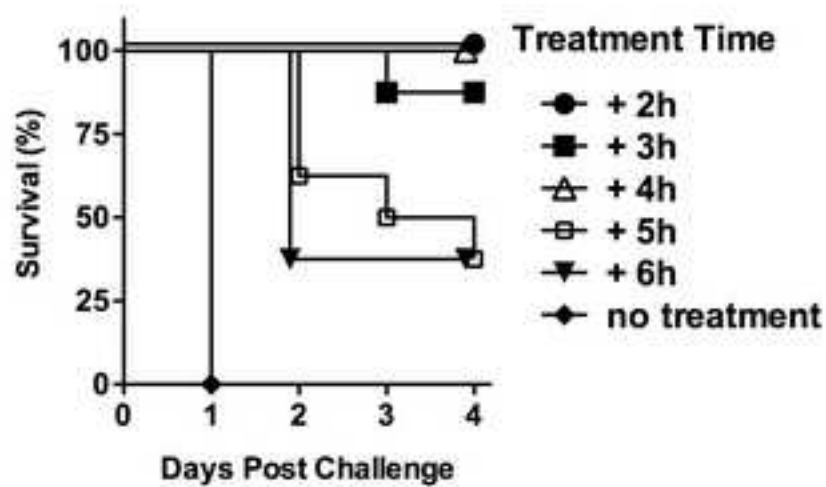

**E-component / supplementary material**

[Click here to download E-component / supplementary material: ricin, seb, etx.png](#)
